# Supplementary material for: Vision impairment and differential access to eye health services in Aotearoa New Zealand: protocol for a scoping review
Source: PubMed Central journal article supplement — BMJ Open. 2021 Sep 13;11(9):e048215. doi: 10.1136/bmjopen-2020-048215 (PMC8442104; doi:10.1136/bmjopen-2020-048215), 2021-09-13
Supplement: bmjopen-2020-048215supp001.pdf [file bmjopen-2020-048215supp001.pdf]

## Supplementary Annex 1: PRISMA-ScR Checklist

| Section                                                     | Item | PRISMA-ScR checklist item                                                                                                                                                                                                                                                                       | Reported on page # |
|-------------------------------------------------------------|------|-------------------------------------------------------------------------------------------------------------------------------------------------------------------------------------------------------------------------------------------------------------------------------------------------|--------------------|
| <b>Title</b>                                                |      |                                                                                                                                                                                                                                                                                                 |                    |
| <b>Title</b>                                                | 1    | Identify the report as a scoping review.                                                                                                                                                                                                                                                        | 1                  |
| <b>Abstract</b>                                             |      |                                                                                                                                                                                                                                                                                                 |                    |
| <b>Structured summary</b>                                   | 2    | Provide a structured summary including, as applicable: background, objectives, eligibility criteria, sources of evidence, charting methods, results and conclusions that relate to the review question(s) and objective(s).                                                                     | 1                  |
| <b>Introduction</b>                                         |      |                                                                                                                                                                                                                                                                                                 |                    |
| <b>Rationale</b>                                            | 3    | Describe the rationale for the review in the context of what is already known. Explain why the review question(s)/objective(s) lend themselves to a scoping review approach.                                                                                                                    | 3                  |
| <b>Objectives</b>                                           | 4    | Provide an explicit statement of the question(s) and objective(s) being addressed with reference to their key elements (e.g., population or participants, concepts, and context), or other relevant key elements used to conceptualize the review question(s) and/or objective(s).              | 4                  |
| <b>Methods</b>                                              |      |                                                                                                                                                                                                                                                                                                 |                    |
| <b>Protocol and registration</b>                            | 5    | Indicate if a review protocol exists, if and where it can be accessed (e.g., web address), and, if available, provide registration information including registration number.                                                                                                                   | 4                  |
| <b>Eligibility criteria</b>                                 | 6    | Specify the characteristics of the sources of evidence (e.g., years considered, language, publication status) used as criteria for eligibility, and provide a rationale.                                                                                                                        | 4                  |
| <b>Information sources</b>                                  | 7    | Describe all information sources (e.g., databases with dates of coverage, contact with authors to identify additional sources) in the search, as well as the date the most recent search was executed.                                                                                          | 5                  |
| <b>Search</b>                                               | 8    | Present the full electronic search strategy for at least one database, including any limits used, such that it could be repeated.                                                                                                                                                               | 5, Annex 1         |
| <b>Selection of sources of evidence</b>                     | 9    | State the process for selecting sources of evidence (i.e., screening, eligibility) included in the scoping review.                                                                                                                                                                              | 5-6                |
| <b>Data charting process</b>                                | 10   | Describe the methods of charting data from the included sources of evidence (e.g., piloted forms; forms that have been tested by the team before their use, whether data charting was done independently, in duplicate) and any processes for obtaining and confirming data from investigators. | 5-6                |
| <b>Data items</b>                                           | 11   | List and define all variables for which data were sought and any assumptions and simplifications made.                                                                                                                                                                                          | 6                  |
| <b>Critical appraisal of individual sources of evidence</b> | 12   | If done provide a rationale for conducting a critical appraisal of included sources of evidence; describe the methods used and how this information was used in any data synthesis (if appropriate).                                                                                            | N/A                |
| <b>Synthesis of results</b>                                 | 13   | Describe the methods of handling and summarizing the data that were charted.                                                                                                                                                                                                                    | 6                  |

From: Tricco AC, Lillie E, Zarin W, O'Brien KK, Colquhoun H, Levac D, et al. PRISMA Extension for Scoping Reviews (PRISMA-ScR): Checklist and Explanation. *Ann Intern Med.* ;169:467–473. doi: 10.7326/M18-0850

**Supplementary Annex 2: MEDLINE search terms**

1. New Zealand/
2. Aotearoa.tw.
3. (New adj2 Zealand\$).tw.
4. (Auckland or Hamilton or Palmerston or Wellington or Nelson or Christchurch or Dunedin).tw.
5. (Maori or Maoris).tw.
6. (Pasifika or Pacifica).tw.
7. (Pacific adj2 (people\$ or patient\$ or island\$)).tw
8. (Samoan or Tongan or Niuean).tw.
9. (Cook adj1 Island\$).tw.
10. Te Wai o Rona.tw.
11. or/1-10
12. exp Cataract/
13. cataract\$.tw.
14. exp Refractive Errors/
15. (myopia or myopic or myopes or hyperop\$ or hypermetrop\$ or presbyop\$).tw.
16. (refractive adj1 error\$).tw.
17. Eyeglasses/
18. (spectacle or spectacles).tw.
19. (eyeglasses or eye glasses).tw.
20. exp Visual Acuity/
21. (visual adj1 acuit\$).tw.
22. Retinal Degeneration/ or Macular Degeneration/ or Wet Macular Degeneration/
23. ((macul\$ or retina\$) adj2 degener\$).tw.
24. maculopathy.tw.
25. exp Glaucoma/
26. (glaucoma\$ or ocular hypertension).tw.
27. Diabetic Retinopathy/
28. ((diabet\$ or proliferat\$) adj3 retinopath\$).tw.
29. (diabet\$ adj3 (eye\$ or vision or visual\$ or sight\$)).tw.
30. (retinopath\$ adj3 (eye\$ or vision or visual\$ or sight\$)).tw.
31. (dilated adj2 fundus).tw.
32. (retinal adj2 exam\$).tw.
33. Blindness/
34. Vision, Low/
35. ((low\$ or impair\$ or partial\$ or loss\$ or limit\$) adj3 (vision or visual\$ or sight\$)).tw.
36. Vision Screening/
37. Vision Tests/
38. Visual Field Tests/
39. ((eye\$ or vision or retina\$ or ophthalm\$ or retinopathy) adj2 exam\$).tw.
40. ((eye\$ or vision or retinopathy or ophthalm\$) adj2 assess\$).tw.
41. ((eye\$ or vision or retina\$ or ophthalm\$ or retinopathy) adj2 test\$).tw.
42. (eye\$ adj2 (disease\$ or care or health or service\$)).tw.
43. or/12-42
44. 11 and 43
45. Prevalence/
46. prevalence.tw.
47. Health Surveys/
48. "Surveys and Questionnaires"/
49. (health adj2 (survey\$ or questionnaire\$)).tw.
50. exp Population Surveillance/
51. (population adj2 (base\$ or survey\$)).tw.
52. Mass Screening/
53. screen\$.tw.
54. "Quality of Health Care"/
55. Quality Improvement/
56. Delivery of Health Care/
57. National Health Programs/
58. State Medicine/
59. Regional Health Planning/
60. Health Planning/
61. Health Plan Implementation/
62. Health Planning Guidelines/
63. Health Care Reform/
64. Health Resources/
65. Health Priorities/
66. Health Services Research/
67. "health services needs and demand"/
68. Needs Assessment/
69. State Health Plans/
70. Regional Health Planning/
71. Community Health Planning/
72. Hospital Planning/
73. Regional Medical Programs/
74. Health Maintenance Organizations/
75. Comprehensive Health Care/
76. Health Facility Planning/
77. Health Facility Administration/
78. Hospital Administration/
79. exp Hospitals, public/
80. exp Hospitals, private/
81. health system\$.tw.
82. Models, Organizational/
83. Decision Making, Organizational/
84. Resource Allocation/
85. Efficiency, Organizational/
86. Organizational Innovation/
87. Delivery of Health Care, Integrated/
88. Interdisciplinary Communication/
89. Public Health/
90. Health Promotion/
91. Policy Making/
92. Program Development/
93. Program Evaluation/
94. Quality Control/
95. Quality Assurance, Health Care/
96. Benchmarking/
97. Capacity Building/
98. Health Services Accessibility/
99. Health Policy/
100. Surgical Procedures, Operative/
101. exp Surgical Equipment/
102. Health Care Rationing/
103. Medically Underserved Area/
104. exp Communication/

105. exp Culture/  
 106. Sex Factors/  
 107. Women's Rights/  
 108. Prejudice/  
 109. Vulnerable Populations/  
 110. Social Responsibility/  
 111. Social Welfare/  
 112. Urban Health Services/  
 113. Rural Health Services/  
 114. Primary Prevention/  
 115. Preventive Health Services/  
 116. Community Health Services/  
 117. Community Health Nursing/  
 118. Health Services, Indigenous/  
 119. Rural Health Services/  
 120. Mobile Health Units/  
 121. exp Patient Acceptance of health Care/  
 122. exp Attitude to Health/  
 123. exp Health Behavior/  
 124. Health Education/  
 125. exp Patient Education as Topic/  
 126. exp Health Promotion/  
 127. Socioeconomic Factors/  
 128. exp Poverty/  
 129. Social Class/  
 130. Employment/  
 131. Healthcare Disparities/  
 132. Health Status Disparities/  
 133. Rural Population/  
 134. Urban Population/  
 135. exp Ethnic Groups/  
 136. Minority Groups/  
 137. ((health\$ or social\$ or racial\$ or ethnic\$) adj5  
 (inequalit\$ or inequit\$ or disparit\$ or equit\$ or  
 disadvantage\$ or depriv\$)).tw.  
 138. (disadvant\$ or marginali\$ or underserved or under  
 served or impoverish\$ or minorit\$ or racial\$ or  
 ethnic\$).tw.  
 139. or/45-138  
 140. exp Eye Diseases/  
 141. (eye\$ or ocular or vision).tw.  
 142. Ophthalmology/  
 143. optometry/ or orthoptics/  
 144. (Ophthalmologist\$ or Optometrist\$ or Optician\$ or  
 Orthopist\$ or Refractionists).tw.  
 145. (Ophthalmic adj3 (surgeon\$ or physician\$ or nurse\$  
 or technician\$ or officer\$ or assistant\$ or staff\$ or  
 worker\$)).tw.  
 146. (eye\$ adj3 (surgeon\$ or physician\$ or nurse\$ or  
 technician\$ or officer\$ or assistant\$ or staff\$ or  
 worker\$)).tw.  
 147. or/140-146  
 148. 11 and 139 and 147  
 149. 44 or 148  
 150. (rabbit\$ or guinea or fish or rat or rats or mouse or  
 mice or bird or birds or chicken).ti.  
 151. (New adj1 Zealand adj4 rabbit\$).tw.  
 152. (Hamilton adj2 (depression or anxiety or rating)).tw.  
 153. (Nelson adj2 (staging or stage or grading or grade or  
 classif\$ or Mandela or Lord or Admiral or  
 Horatio)).tw.  
 154. (India or China or Ethiopia).ti.  
 155. (cell or cells or apoptosis or vitro or vivo).ti.  
 156. (gene or genes or genetic or polymorph\$).ti.  
 157. (mutation or molecular or chromosome or biopsy or  
 Zika).ti.  
 158. or/150-157  
 159. 149 not 158  
 160. case reports/  
 161. 159 not 160  
 162. limit 161 to (editorial or letter)  
 163. 161 not 162
